# Supplementary material
Source: PubMed Central journal article supplement (PMC2906268)

Supplementary material - Venceslau *et al.*, “**THE Qrc MEMBRANE COMPLEX, RELATED TO THE ALTERNATIVE COMPLEX III, IS A MENAQUINONE REDUCTASE INVOLVED IN SULFATE RESPIRATION**”

Figure S1 Legend

Dendrogram for QrcB proteins and related subunits. Abbreviations: QrcB, Quinone reductase complex, subunit B; ActB\_1, Alternative Complex III, domain 1 of subunit B; PsrA, Polysulfide reductase, subunit A; TtrA, Tetrathionate reductase, subunit A; TsrA, Thiosulfate reductase, subunit A; NarG, Nitrate reductase, alpha subunit; DmsA, Dimethyl sulfoxide reductase, alpha subunit; FdhF, Formate dehydrogenase F, alpha subunit; FdnG, Formate dehydrogenase G, alpha subunit; Nqo3, NADH-quinone oxidoreductase, subunit 3.

Organisms: DvH, *D. vulgaris* Hildenborough; DvulM, *Desulfovibrio vulgaris* Miyazaki; SynFum, *Syntrophobacter fumaroxidans* MPOB; Dsoleo, *Desulfococcus oleovorans* Hxd3; Dsalken *Desulfatibacillum alkenivorans* AK-01; SolUsit, *Solibacter usitatus* Ellin6076; Dmbac, *Desulfomicrobium baculatum* DSM 4028; Dsalex, *Desulfovibrio salexigens* DSM 2638; Dsretb, *Desulfohalobium retbaense* DSM 5692; Dsauto, *Desulfobacterium autotrophicum* HRM2; Gmetali, *Geobacter metallireducens* GS-15; Mariferr, *Mariprofundus ferrooxydans* PV-1; Myxant, *Myxococcus xanthus* DK 1622; Rhmari, *Rhodothermus marinus* DSM 4252; Chaur, *Chloroflexus aurantiacus* J-10-fl; Nitoea, *Nitrosococcus oceani*; Rhaeutr, *Ralstonia eutropha* JMP134; Tther, *Thermus thermophilus*; Carhydrog, *Carboxydothemus hydrogenoformans* Z-2901; Wsuc, *Wolinella succinogenes*; Sheone, *Shewanella oneidensis*; Yeenter, *Yersinia enterocolitica* 8081; Psstu, *Pseudomonas stutzeri* A1501; Salen, *Salmonella enteritidis* PT4; Ec11, *Escherichia coli* SE11; Ecol, *Escherichia coli* K12; Myctub, *Mycobacterium tuberculosis*; Baclie, *Bacillus licheniformis*; Rhsp, *Rhodobacter sphaeroides*; Hinf, *Haemophilus influenzae*; Mooth, *Moorella thermoacetica* ATCC 39073; Bthu, *Bacillus thuringiensis*; Dehafn, *Desulfitobacterium hafniense*; Vfish, *Vibrio fischeri*; Shonei, *Shewanella oneidensis*; Psent, *Pseudomonas entomophila* L48; Pden, *Paracoccus denitrificans* PD1222.

Figure S1

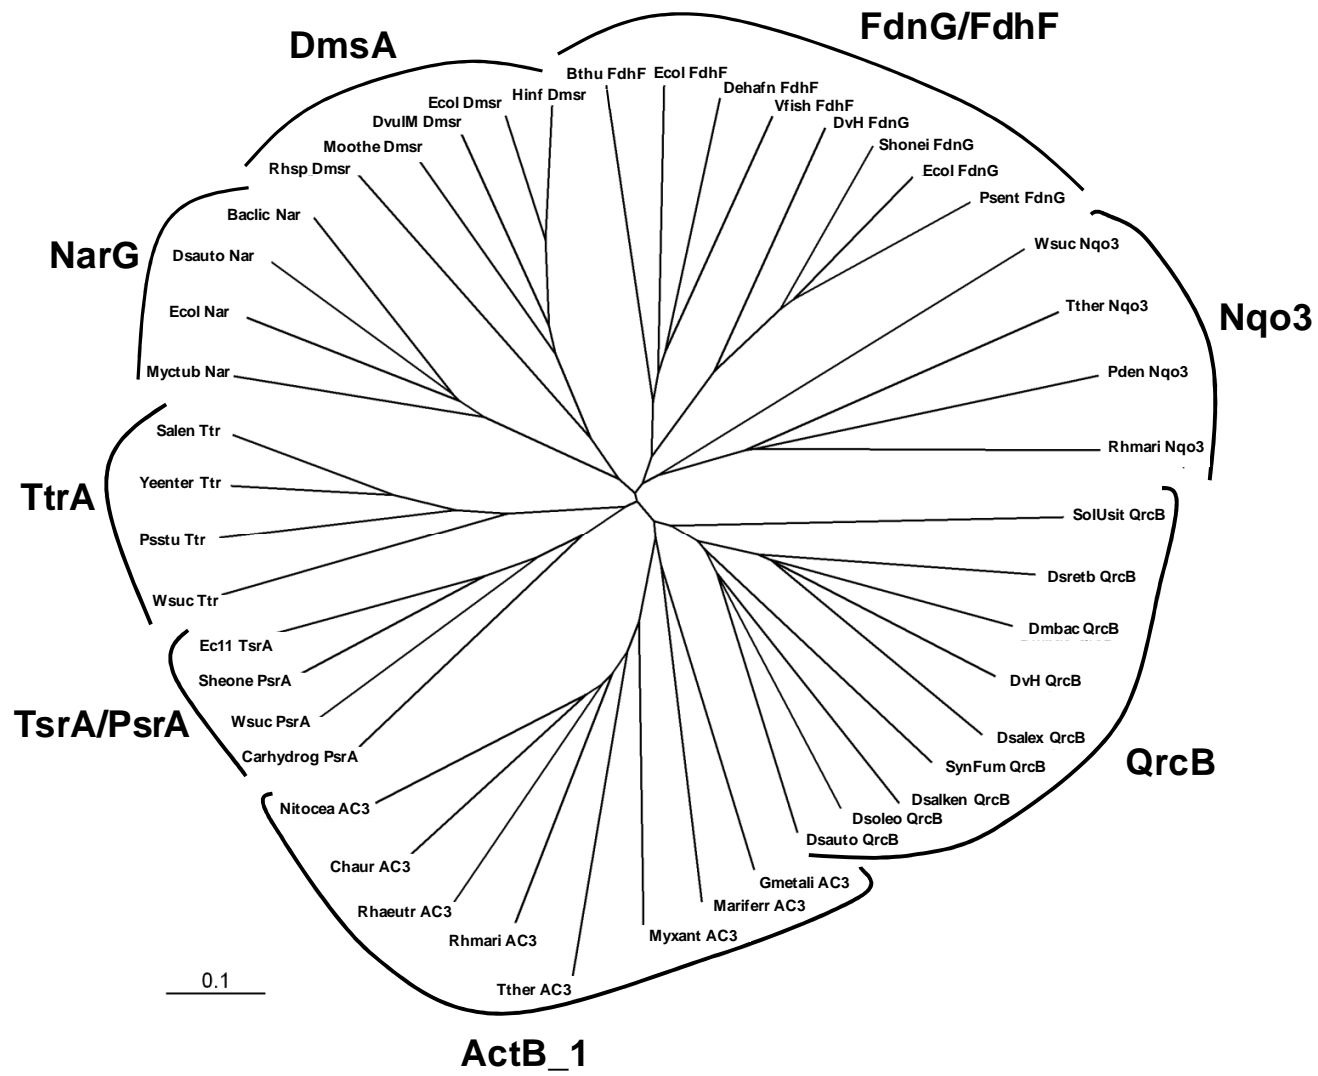

Supplement: supp_M110.124305_jbc.M110.124305-1.pdf [file supp_M110.124305_jbc.M110.124305-1.pdf]
